# Supplementary material
Source: PubMed Central journal article supplement (PMC6583246)
Supplement: jama-319-2021-s002.pdf [file jama-319-2021-s002.pdf]

## Supplementary Online Content

Click B, Pinsky PF, Hickey T, Doroudi M, Schoen RE. Association of colonoscopy adenoma findings with long-term colorectal cancer incidence. *JAMA*. doi:10.1001/jama.2018.5809

**eTable 1.** Demographics and Index Colonoscopy Findings by Extended Follow-up Status

**eTable 2.** Location of Adenoma on Initial Colonoscopy and Colorectal Cancer Incidence and Location

**eTable 3.** Colorectal Cancer Stage by Index Colonoscopy Adenoma Group

This supplementary material has been provided by the authors to give readers additional information about their work.

**eTable 1. Demographics and index colonoscopy findings by extended follow-up status**

|                              | <b>Declined Extended Follow-up (N=1546)</b> | <b>Completed Extended Follow-up (N=14389)</b> | <b>P-value</b> |
|------------------------------|---------------------------------------------|-----------------------------------------------|----------------|
| Median Age (IQR)             | 64 (61-68)                                  | 65 (61-69)                                    | 0.02           |
| Male, (%)                    | 816 (52.8)                                  | 8691 (60.4)                                   | <0.001         |
| White Non-Hispanic Race, (%) | 1469 (95.0)                                 | 12979 (90.2)                                  | <0.001         |
| <b>Adenoma Group, (%)</b>    |                                             |                                               |                |
| Advanced Adenoma             | 282 (18.2)                                  | 2600 (18.1)                                   | 0.80           |
| Non-Advanced Adenoma         | 480 (31.1)                                  | 4588 (31.9)                                   |                |
| No Adenoma                   | 784 (50.7)                                  | 7201 (50.1)                                   |                |

**eTable 2. Location of adenoma on index colonoscopy and colorectal cancer (CRC) incidence and location**

| Location                                                                                                                                                                                                                                                                                                                                                                                                                                                                                                                                                                                                                                                                                                                | N    | Person Years Follow-up | Subsequent CRC N (%)   | Subsequent CRC Location |          | CRC Rate (per 10,000 PY) | Rate Difference (95% CI) per 10,000 PY | RR (95% CI) for CRC |
|-------------------------------------------------------------------------------------------------------------------------------------------------------------------------------------------------------------------------------------------------------------------------------------------------------------------------------------------------------------------------------------------------------------------------------------------------------------------------------------------------------------------------------------------------------------------------------------------------------------------------------------------------------------------------------------------------------------------------|------|------------------------|------------------------|-------------------------|----------|--------------------------|----------------------------------------|---------------------|
|                                                                                                                                                                                                                                                                                                                                                                                                                                                                                                                                                                                                                                                                                                                         |      |                        |                        | Distal                  | Proximal |                          |                                        |                     |
| <b>1-2 Non-Advanced Adenoma</b>                                                                                                                                                                                                                                                                                                                                                                                                                                                                                                                                                                                                                                                                                         |      |                        |                        |                         |          |                          |                                        |                     |
| Distal only                                                                                                                                                                                                                                                                                                                                                                                                                                                                                                                                                                                                                                                                                                             | 2941 | 35631                  | 29 (1.0%) <sup>a</sup> | 12                      | 16       | 8.1                      | Ref                                    | Ref                 |
| Proximal only                                                                                                                                                                                                                                                                                                                                                                                                                                                                                                                                                                                                                                                                                                           | 1029 | 11767                  | 14 (1.4%) <sup>a</sup> | 5                       | 8        | 11.9                     | 3.8 (-3.1-10.7)                        | 1.5 (0.7-2.8)       |
| Both                                                                                                                                                                                                                                                                                                                                                                                                                                                                                                                                                                                                                                                                                                                    | 373  | 4559                   | 3 (0.8%)               | 0                       | 3        | 6.6                      | -1.6 (-9.6-6.5)                        | 0.8 (0.2-2.7)       |
| Unknown                                                                                                                                                                                                                                                                                                                                                                                                                                                                                                                                                                                                                                                                                                                 | 153  | 1856                   | 2 (1.3%)               | 1                       | 1        | 10.8                     | 2.6 (-12.6-17.9)                       | 1.3 (0.3-5.7)       |
| <b>Advanced Adenoma</b>                                                                                                                                                                                                                                                                                                                                                                                                                                                                                                                                                                                                                                                                                                 |      |                        |                        |                         |          |                          |                                        |                     |
| Distal only                                                                                                                                                                                                                                                                                                                                                                                                                                                                                                                                                                                                                                                                                                             | 1990 | 24676                  | 37 (1.9%) <sup>b</sup> | 16                      | 19       | 15.0                     | Ref                                    | Ref                 |
| Proximal only                                                                                                                                                                                                                                                                                                                                                                                                                                                                                                                                                                                                                                                                                                           | 565  | 6426                   | 25 (4.4%) <sup>b</sup> | 5                       | 18       | 38.9                     | 23.9 (7.9-39.9)                        | 2.6 (1.6-4.3)       |
| Both                                                                                                                                                                                                                                                                                                                                                                                                                                                                                                                                                                                                                                                                                                                    | 248  | 2966                   | 7 (2.8%) <sup>b</sup>  | 3                       | 4        | 23.6                     | 8.6 (-9.5-26.7)                        | 1.6 (0.7-3.5)       |
| Unknown                                                                                                                                                                                                                                                                                                                                                                                                                                                                                                                                                                                                                                                                                                                 | 79   | 925                    | 1 (1.3%)               | 0                       | 1        | 10.8                     | -4.2 (-25.9-17.5)                      | 0.7 (0.1-5.2)       |
| AA: advanced adenoma; CRC: colorectal cancer; PY: person years; RR: rate ratio; CI: confidence interval<br>Advanced adenoma defined as $\geq 1$ cm, or villous, or tubulovillous, or high grade dysplasia on histology<br><sup>a</sup> One proximal only and one distal only 1-2 non-advanced adenoma had CRC in an unknown location.<br><sup>b</sup> Two proximal only advanced adenoma and two distal only advanced adenoma had CRC in an unknown location.<br>There was no significant association between location of initial non-advanced adenoma and subsequent CRC location (P=0.79).<br>There was no significant association between location of initial advanced adenoma and subsequent CRC location (P=0.06). |      |                        |                        |                         |          |                          |                                        |                     |

**eTable 3. Colorectal cancer stage by index colonoscopy adenoma group**

|                     | <b>Advanced Adenoma</b> | <b>Non-advanced adenoma</b> | <b>No adenoma</b> | <b>P-value</b> |
|---------------------|-------------------------|-----------------------------|-------------------|----------------|
| Stage I/II, N (%)   | 42 (60.0)               | 30 (54.5)                   | 39 (54.9)         | 0.78           |
| Stage III/IV, N (%) | 22 (31.4)               | 18 (32.7)                   | 24 (33.8)         | 0.96           |
| Unknown, N (%)      | 6 (8.6)                 | 7 (12.7)                    | 8 (11.3)          | 0.77           |
| All, N (%)          | 70 (100)                | 55 (100)                    | 71 (100)          |                |

Association tested using Chi square or Fisher's exact test when appropriate of adenoma group by cancer stage categories.
